# Supplementary material for: Proteomic Analysis of Banana Vascular Sap Provides Insight Into Resistance Mechanisms to Fusarium Oxysporum F. Sp. Cubense Tropical Race 4
Source: Research Square preprint supplement (doi:10.21203/rs.3.rs-307891/v1), 2021-03-13
Supplement: Supplementary file 1 [file 64bda0c5680be07645c4ded2.xls]

## Sheet: P_dpi vs P_mock
Accession	Description	FC(P_dpi/P_mock)	Log2FC(P_dpi/P_mock)	P_value(P_dpi/P_mock)	Regulate	Domain	Domain Description	Subcellular Loc	Unique Peptides	Coverage（%）	MW [kDa]	FDR Confidence
AEX15265.1	vacuolar invertase [Musa acuminata AAA Group]	2.16008	1.11108	0.03031	up	Glyco_hydro_32N;Glyco_hydro_32C;DUF3357	Glycosyl hydrolases family 32 N-terminal domain;Glycosyl hydrolases family 32 C terminal;Domain of unknown function	Golgi apparatus	3	8.06202	70.306	High
XP_009382608.1	D-xylose-proton symporter-like 2 [Musa acuminata subsp. malaccensis]	0.509804	-0.971986	0.01381	down	Sugar_tr;MFS_1	Sugar;Major Facilitator Superfamily	cytoplasmic	7	13.0522	53.123	High
XP_009384766.1	probable chalcone-flavonone isomerase 3 isoform X1 [Musa acuminata subsp. malaccensis]	1.83505	0.875821	0.008181	up	Chalcone;Chalcone_2	Chalcone-flavanone isomerase;Chalcone isomerase like	cytoplasmic	12	54.0284	23.68	High
XP_009386847.1	NAD(P)H:quinone oxidoreductase [Musa acuminata subsp. malaccensis]	0.60729	-0.719542	0.01957	down	FMN_red;Flavodoxin_2	NADPH-dependent FMN reductase;Flavodoxin-like fold	mitochondrial	4	33.8384	21.909	High
XP_009389747.1	protein DETOXIFICATION 18-like [Musa acuminata subsp. malaccensis]	0.602476	-0.731024	0.03132	down	MatE	MatE	Golgi apparatus	5	10.1053	51.994	High
XP_009390018.1	monodehydroascorbate reductase-like [Musa acuminata subsp. malaccensis]	0.823848	-0.279549	0.03875	down	Pyr_redox_2;Pyr_redox	Pyridine nucleotide-disulphide oxidoreductase;Pyridine nucleotide-disulphide oxidoreductase	peroxisomal	12	46.5438	47.036	High
XP_009392132.1	putative chloride channel-like protein CLC-g isoform X1 [Musa acuminata subsp. malaccensis]	0.737083	-0.440101	0.01453	down	Voltage_CLC;CBS	Voltage gated chloride channel;CBS domain	cytoplasmic	2	3.10174	88.709	High
XP_009394303.1	glycine-rich RNA-binding protein-like [Musa acuminata subsp. malaccensis]	1.22037	0.287321	0.02355	up	RRM_1	RNA recognition motif.	nuclear	1	18.8235	17.254	High
XP_009395774.1	vesicle transport v-SNARE 13-like [Musa acuminata subsp. malaccensis]	0.479331	-1.06091	0.02585	down	V-SNARE;V-SNARE_C;Sec20	Vesicle transport v-SNARE protein N-terminus;Snare region anchored in the vesicle membrane C-terminus;Sec20	nuclear	7	44.7964	24.97	High
XP_009398768.1	fumarylacetoacetase [Musa acuminata subsp. malaccensis]	1.21868	0.285315	0.006432	up	FAA_hydrolase;FAA_hydrolase_N	Fumarylacetoacetate;Fumarylacetoacetase N-terminal	cytoplasmic	7	17.5644	46.883	High
XP_009399225.1	putative aconitate hydratase, cytoplasmic [Musa acuminata subsp. malaccensis]	1.54183	0.624641	0.001342	up	Aconitase;Aconitase_C	Aconitase family;Aconitase C-terminal domain	chloroplast	3	15.2064	108.981	High
XP_009399960.1	potassium transporter 7-like isoform X1 [Musa acuminata subsp. malaccensis]	0.683414	-0.549168	0.006279	down	K_trans	K+ potassium transporter	Golgi apparatus	1	1.27226	88.162	High
XP_009401931.1	V-type proton ATPase subunit a3 [Musa acuminata subsp. malaccensis]	0.738359	-0.437606	0.02763	down	V_ATPase_I	V-type ATPase 116kDa subunit family	cytoplasmic	7	10.399	94.296	High
XP_009405126.1	V-type proton ATPase subunit d2 isoform X1 [Musa acuminata subsp. malaccensis]	0.64	-0.643856	0.03665	down	vATP-synt_AC39	ATP synthase	cytoplasmic	3	8.83191	40.608	High
XP_009406506.1	reactive Intermediate Deaminase A, chloroplastic [Musa acuminata subsp. malaccensis]	0.677485	-0.56174	0.02997	down	Ribonuc_L-PSP	Endoribonuclease L-PSP	chloroplast	2	14.5161	19.722	High
XP_009408396.1	E3 ubiquitin protein ligase RIE1 [Musa acuminata subsp. malaccensis]	0.737902	-0.438499	0.03152	down	zf-RING_2;zf-C3HC4_2;zf-RING_11;zf-rbx1;zf-C3HC4	Ring finger domain;Zinc finger, C3HC4 type;RING-like zinc finger;RING-H2 zinc finger domain;Zinc finger, C3HC4 type	cytoplasmic	3	8.10056	39.582	High
XP_009419093.1	protein NUCLEAR FUSION DEFECTIVE 4 [Musa acuminata subsp. malaccensis]	0.602244	-0.731579	0.02425	down	Nodulin-like;MFS_1	Nodulin-like;Major Facilitator Superfamily	Golgi apparatus	2	3.5461	61.025	High
XP_018676514.1	protein DETOXIFICATION 33-like isoform X1 [Musa acuminata subsp. malaccensis]	0.648877	-0.623983	0.02644	down	MatE	MatE	cytoplasmic	3	7.6	54.861	High
XP_018684918.1	hypersensitive-induced response protein 1 [Musa acuminata subsp. malaccensis]	0.493289	-1.0195	0.02566	down	Band_7	SPFH domain / Band 7 family	cytoplasmic	11	34.0351	31.432	High

## Sheet: B_dpi vs B_mock
Accession	Description	FC(B_dpi/B_mock)	Log2FC(B_dpi/B_mock)	P_value(B_dpi/B_mock)	Regulate	Domain	Domain Description	Subcellular Loc	Unique Peptides	Coverage（%）	MW [kDa]	FDR Confidence
XP_009383207.1	heat shock protein 81-1-like [Musa acuminata subsp. malaccensis]	1.35395	0.437173	0.00584	up	HSP90;HATPase_c;HATPase_c_3	Hsp90 protein;Histidine kinase-, DNA gyrase B-, and HSP90-like ATPase;Histidine kinase-, DNA gyrase B-, and HSP90-like ATPase	cytoplasmic	1	21.2857	80.24	High
XP_009385667.1	70 kDa peptidyl-prolyl isomerase [Musa acuminata subsp. malaccensis]	1.29545	0.373455	0.03369	up	FKBP_C;TPR_1;TPR_2;TPR_8;TPR_19;TPR_11;TPR_12;TPR_16	FKBP-type peptidyl-prolyl cis-trans isomerase;Tetratricopeptide repeat;Tetratricopeptide repeat;Tetratricopeptide repeat;Tetratricopeptide repeat;TPR repeat;Tetratricopeptide repeat;Tetratricopeptide repeat	cytoplasmic	10	15.6627	64.737	High
XP_009398768.1	fumarylacetoacetase [Musa acuminata subsp. malaccensis]	1.52015	0.604213	0.02961	up	FAA_hydrolase;FAA_hydrolase_N	Fumarylacetoacetate;Fumarylacetoacetase N-terminal	cytoplasmic	7	17.5644	46.883	High
XP_009399499.1	leucoanthocyanidin dioxygenase-like [Musa acuminata subsp. malaccensis]	1.47071	0.556516	0.03796	up	DIOX_N;2OG-FeII_Oxy	non-haem dioxygenase in morphine synthesis N-terminal;2OG-F	cytoplasmic	17	50	40.649	High
XP_009403980.1	60S ribosomal protein L26-2-like [Musa acuminata subsp. malaccensis]	1.38905	0.474103	0.02561	up	Ribosomal_L26;KOW	Ribosomal proteins L26 eukaryotic, L24P archaeal;KOW motif	mitochondrial	4	17.6101	17.558	High
XP_009404156.1	metal tolerance protein 4 [Musa acuminata subsp. malaccensis]	0.763446	-0.389402	0.03033	down	Cation_efflux;ZT_dimer	Cation efflux family;Dimerisation domain of Zinc Transporter	cytoplasmic	6	14.0049	45.796	High
XP_009408057.1	glutaredoxin-C8 [Musa acuminata subsp. malaccensis]	0.648098	-0.625717	0.03022	down	Glutaredoxin	Glutaredoxin	cytoplasmic	5	39.2593	14.633	High
XP_009416141.1	triosephosphate isomerase, cytosolic isoform X3 [Musa acuminata subsp. malaccensis]	0.683007	-0.550027	0.04382	down	TIM	Triosephosphate isomerase	cytoplasmic	4	30.315	27.135	High
XP_009419545.1	alcohol dehydrogenase class-3 [Musa acuminata subsp. malaccensis]	1.2886	0.365808	0.01723	up	ADH_zinc_N;ADH_N	Zinc-binding dehydrogenase;Alcohol dehydrogenase GroES-like domain	cytoplasmic	3	14.5119	40.693	High
XP_009420195.1	vesicle-associated membrane protein 714-like isoform X1 [Musa acuminata subsp. malaccensis]	0.762921	-0.390394	0.04269	down	Synaptobrevin;Longin	Synaptobrevin;Regulated-SNARE-like domain	peroxisomal	9	50.2262	25.041	High
XP_009421271.1	adenosine kinase 2 [Musa acuminata subsp. malaccensis]	1.28112	0.357404	0.04385	up	PfkB	pfkB family carbohydrate kinase	cytoplasmic	12	43.1085	37.328	High

## Sheet: P_dpi vs B_dpi
Accession	Description	FC(P_dpi/B_dpi)	Log2FC(P_dpi/B_dpi)	P_value(P_dpi/B_dpi)	Regulate	Domain	Domain Description	Subcellular Loc	Unique Peptides	Coverage（%）	MW [kDa]	FDR Confidence	RefSeq	V2 annotation	Additional functional information	Paralogs
CBC69916.1	unnamed protein product [Musa acuminata]	0.336984	-1.56925	0.004925	down	polyprenyl_synt	Polyprenyl synthetase	cytoplasmic	1	33.3333	40.745	High	LOC103998661	Ma09_t22750	farnesyl pyrophosphate synthase 1-like	LOC103979965 (Ma03_t29760)
XP_009382467.1	uncharacterized protein LOC103970421 [Musa acuminata subsp. malaccensis]	1.72014	0.782524	0.03223	up	PD40;DPPIV_N	WD40-like Beta Propeller Repeat;Dipeptidyl peptidase IV	cytoplasmic	5	10.2134	71.625	High	LOC103970421	Ma11_t04610	WD40-like Beta Propeller Repeat family protein	no paralogs
XP_009382515.1	GDSL esterase/lipase At1g28580-like [Musa acuminata subsp. malaccensis]	2.27129	1.18351	0.03707	up	Lipase_GDSL	GDSL-like Lipase/Acylhydrolase	ER	2	6.41711	40.233	High	LOC103970461	Ma11_t05100	[OG-GDSL-C4h], in corm was [OG-GDSL-C10h]	several paralogs
XP_009382788.1	anthocyanidin 3-O-glucoside 6''-O-acyltransferase-like [Musa acuminata subsp. malaccensis]	0.642427	-0.638397	0.007036	down	Transferase	Transferase family	cytoplasmic	12	25.1627	49.148	High	LOC103970649	Ma11_t07290		no paralogs
XP_009382833.1	V-type proton ATPase catalytic subunit A-like [Musa acuminata subsp. malaccensis]	0.579637	-0.786779	0.001481	down	ATP-synt_ab;ATP-synt_ab_Xtn;ATP-synt_ab_N	ATP synthase alpha/beta family, nucleotide-binding domain;ATPsynthase alpha/beta subunit N-term extension;ATP synthase alpha/beta family, beta-barrel domain	cytoplasmic	1	33.1723	68.432	High	LOC103970680	Ma11_t07700		LOC103982160 (Ma01_t01200)	LOC103998735 (Ma09_t23510)
XP_009392858.1	glutelin type-B 2-like [Musa acuminata subsp. malaccensis]	1.28502	0.36179	0.04881	up	------	------	nuclear	1	8.75912	15.391	Medium	LOC103978692	Ma03_t28140		no paralogs
XP_009393195.1	importin subunit alpha-1b-like [Musa acuminata subsp. malaccensis]	1.29006	0.367442	0.02813	up	Arm;HEAT_EZ;IBB;HEAT_2;Arm_3;HEAT;Adaptin_N	Armadillo/beta-catenin-like repeat;HEAT-like repeat;Importin beta binding domain;HEAT repeats;Atypical Arm repeat;HEAT repeat;Adaptin N terminal region	cytoplasmic	1	22.6415	58.408	High	LOC103978946	Ma03_t25410		LOC103986280 (Ma05_t29460)	LOC103993682 (Ma08_t06370)	LOC103985503 (Ma01_t08260)
XP_009395287.1	60S ribosomal protein L23-like [Musa acuminata subsp. malaccensis]	1.33196	0.413551	0.02381	up	Ribosomal_L14	Ribosomal protein L14p/L23e	mitochondrial	2	13.5714	15.049	High	LOC103980574	Ma04_t04260		multicopy
XP_009396479.1	uncharacterized protein LOC103981465 [Musa acuminata subsp. malaccensis]	1.53976	0.622705	0.03154	up	------	------	cytoplasmic	6	19.8171	35.853	High	LOC103981465	Ma04_t14840	calcium-binding EF hand family
XP_009397700.1	pyruvate kinase isozyme A, chloroplastic-like [Musa acuminata subsp. malaccensis]	1.61342	0.690119	0.03725	up	PK;PK_C	Pyruvate kinase, barrel domain;Pyruvate kinase, alpha/beta domain	chloroplast	2	7.43363	61.92	High	LOC103982488	Ma04_t35050		LOC103983115 (Ma04_t27720), LOC103975283 (Ma02_t19270)
XP_009397893.1	phenolic glucoside malonyltransferase 1-like [Musa acuminata subsp. malaccensis]	1.48144	0.566996	0.03381	up	Transferase	Transferase family	cytoplasmic	1	3.30396	48.802	High	LOC103982634	Ma04_t33310		multicopy
XP_009402230.1	ERBB-3 BINDING PROTEIN 1 [Musa acuminata subsp. malaccensis]	0.802847	-0.316804	0.04936	down	Peptidase_M24	Metallopeptidase family M24	cytoplasmic	4	9.87342	43.423	High	LOC103986077	Ma05_t31740	metallopeptidase M24 family protein	LOC103972250 (Ma11_t22160)
XP_009403023.1	3'-N-debenzoyl-2'-deoxytaxol N-benzoyltransferase-like [Musa acuminata subsp. malaccensis]	1.65425	0.726175	0.01139	up	Transferase	Transferase family	cytoplasmic	10	39.0476	45.625	High	LOC103986676	Ma06_t03390		multicopy
XP_009403024.1	3'-N-debenzoyl-2'-deoxytaxol N-benzoyltransferase-like [Musa acuminata subsp. malaccensis]	0.532606	-0.90886	0.02494	down	Transferase	Transferase family	cytoplasmic	1	3.80048	46.451	Medium	LOC103986678	Ma06_t03410		tandem amplified
XP_009403240.1	uncharacterized protein LOC103986848 [Musa acuminata subsp. malaccensis]	1.55538	0.637271	0.01737	up	------	------	cytoplasmic	1	6.0241	17.775	High	LOC103986848	Ma06_t04880	polyadenylate-binding protein-interacting protein 6	no paralogs
XP_009406873.1	probable carboxylesterase 8 [Musa acuminata subsp. malaccensis]	1.72093	0.783189	0.001278	up	Abhydrolase_3;COesterase	alpha/beta hydrolase fold;Carboxylesterase family	cytoplasmic	8	28.882	35.206	High	LOC103989673	Ma06_t34160	carboxylesterase 1-like	LOC103980641 (Ma04_t05010)
XP_009408497.1	short-chain type dehydrogenase/reductase-like [Musa acuminata subsp. malaccensis]	0.821617	-0.283462	0.01805	down	adh_short_C2;adh_short;KR	Enoyl;short chain dehydrogenase;KR domain	mitochondrial	2	7.19697	26.992	High	LOC103990924	Ma07_t01480		no paralogs
XP_009408784.1	uncharacterized protein LOC103991148 [Musa acuminata subsp. malaccensis]	1.78946	0.839525	0.03237	up	Acetyltransf_3;Acetyltransf_1;Acetyltransf_4;Acetyltransf_8	Acetyltransferase;Acetyltransferase;Acetyltransferase;Acetyltransferase	mitochondrial	3	15.0485	23.297	High	LOC103991148	Ma07_t01440	N-acetyltransferase p20-like	no paralogs
XP_009408856.1	V-type proton ATPase subunit B2 [Musa acuminata subsp. malaccensis]	0.697298	-0.520152	0.03308	down	ATP-synt_ab;ATP-synt_ab_N	ATP synthase alpha/beta family, nucleotide-binding domain;ATP synthase alpha/beta family, beta-barrel domain	cytoplasmic	18	43.2377	54.456	High	LOC103991217	Ma07_t08920		LOC103975351 (Ma02_t18490)	LOC103985524 (Ma05_t24580)
XP_009411523.1	transketolase, chloroplastic-like [Musa acuminata subsp. malaccensis]	1.42942	0.515428	0.04324	up	Transketolase_N;Transket_pyr;Transketolase_C	Transketolase, thiamine diphosphate binding domain;Transketolase, pyrimidine binding domain;Transketolase, C-terminal domain	chloroplast	4	12.6667	80.586	High	LOC103993252	Ma01_t13030	the pentose phosphate pathway in all organisms and the Calvin cycle of photosynthesis	LOC103977924 (Ma03_t11290)	LOC103998561 (Ma09_t21430)	LOC103974660 (Ma03_t16830+Ma03_t16840), pseudo
XP_009413233.1	non-specific phospholipase C4-like [Musa acuminata subsp. malaccensis]	1.37102	0.455255	0.04987	up	Phosphoesterase	Phosphoesterase family	cytoplasmic	2	3.43512	58.816	High	LOC103994584	Ma08_t15600		LOC103975225 (Ma02_t19880)
XP_009416856.1	vesicle-associated membrane protein 711 [Musa acuminata subsp. malaccensis]	0.806421	-0.310395	0.02772	down	Synaptobrevin;Longin	Synaptobrevin;Regulated-SNARE-like domain	Golgi apparatus	3	40.4545	25.004	High	LOC103997382	Ma09_t08820	Synaptobrevin	LOC103990071 (Ma06_t37020)
XP_009417936.1	xylose isomerase [Musa acuminata subsp. malaccensis]	0.745951	-0.422848	0.03066	down	AP_endonuc_2	Xylose isomerase-like TIM barrel	ER	11	25.4697	53.464	High	LOC103998240	Ma09_t16420		LOC103977712 (Ma03_t08830)
XP_009418948.1	cysteine synthase-like [Musa acuminata subsp. malaccensis]	0.652841	-0.615197	0.009348	down	PALP	Pyridoxal-phosphate dependent enzyme	cytoplasmic	3	26.2346	33.933	High	LOC103999037	Ma09_t26210		LOC103971570 (Ma11_t14450)
XP_009421020.1	uncharacterized protein At4g14100-like [Musa acuminata subsp. malaccensis]	0.680869	-0.554551	0.02592	down	------	------	extracellular	3	15.859	25.877	High	LOC104000651	Ma10_t12380	transferases, transferring glycosyl groups	no paralogs
XP_018677619.1	uncharacterized membrane protein At1g16860-like [Musa acuminata subsp. malaccensis]	1.49922	0.584211	0.02545	up	------	------	cytoplasmic	1	1.24224	52.06	Medium	LOC103982065	Ma01_t01130	Ubiquitin-specific protease family C19-related protein	multicopy
	DEPs identified in ‘P_dpi vs B_dpi’−‘P_mock vs B_mock’
	In this table we added the RefSeq (NCBI) annotation locus codes and the V2 annotation names (column “C” and “D”, respectively) for the 26 genes. Moreover, when a more informative or alternative functional annotation was available we added it in the “E” column. Finally, we checked if one or more paralogs or similar genes are present in Musa A genome (Column “F” and “G”, respectively).
